# Supplementary material for: A carbon-nitrogen negative feedback loop underlies the repeated evolution of cnidarian–Symbiodiniaceae symbioses
Source: PubMed Central journal article supplement (PMC10620218; doi:10.1038/s41467-023-42582-y), 2023-11-01
Supplement: 41467_2023_42582_MOESM3_ESM.pdf [file 41467_2023_42582_MOESM3_ESM.pdf]

## Description of Additional Supplementary Files

**Supplementary Data 1.** Quantitative results of labeled metabolites isolated from symbiotic *S. pistillata*

**Supplementary Data 2.** Quantitative results of labeled metabolites isolated from symbiotic *E. diaphana*

**Supplementary Data 3.** Quantitative results of labeled metabolites isolated from symbiotic *C. andromeda*

**Supplementary Data 4.** Quantitative results of labeled metabolites isolated from aposymbiotic *E. diaphana*

**Supplementary Data 5.** the relative abundance of isotope-labeled metabolites ( $^{13}\text{C}^{14}\text{N}$ ,  $^{12}\text{C}^{15}\text{N}$ , and  $^{13}\text{C}^{15}\text{N}$ ) normalized to their natural non-labeled forms ( $^{12}\text{C}^{14}\text{N}$ )
